# Supplementary material
Source: ML conference proceedings conference paper supplement (https://openaccess.thecvf.com/content/CVPR2026/html/Xu_Reparameterized_Tensor_Ring_CVPR_2026_paper.html)
Supplement: Supplementary file 1 [file Xu_Reparameterized_Tensor_Ring_CVPR_2026_supplemental.pdf]

# Reparameterized Tensor Ring Functional Decomposition for Multi-Dimensional Data Recovery

## Supplementary Material

This supplementary material provides additional technical details and experimental results. In Section A, we present the complete proofs of all theorems in the main paper. Section B describes the model configurations and parameter settings used for the four tasks. Section C reports extended experiments, including ablation studies and practical applications.

### A. Detailed Proofs of Theorems

**Theorem 1.** Let  $\mathcal{X} = \Phi(\mathcal{G}^{(1)}, \dots, \mathcal{G}^{(d)})$  be a TR decomposition. Suppose that the mode-2 frequency components of  $\mathcal{G}^{(k)}$  beyond a threshold  $\Omega_k$  are negligible for all  $k$ , i.e.,

$$\|(\mathcal{F}_2[\mathcal{G}^{(k)}])_{:\omega_k}\|_\infty \leq \epsilon, \quad \forall |\omega_k| > \Omega_k, k = 1, 2, \dots, d,$$

where  $\epsilon > 0$  is a small constant. Then the reconstructed tensor  $\mathcal{X}$  also exhibits attenuated high-frequency content along mode  $k$ :

$$\|(\mathcal{F}_k[\mathcal{X}])_{:\omega_k}\|_\infty \leq c_k \epsilon, \quad \forall |\omega_k| > \Omega_k, k = 1, 2, \dots, d,$$

where  $c_k$  is a constant depending only on the magnitudes of the remaining cores  $\{\mathcal{G}^{(j)}\}_{j \neq k}$ .

*Proof.* In TR decomposition, each element of  $\mathcal{X}$  is expressed as

$$\mathcal{X}_{v_1, \dots, v_d} = \text{trace}(\mathcal{G}_{:v_1:}^{(1)} \mathcal{G}_{:v_2:}^{(2)} \dots \mathcal{G}_{:v_k:}^{(k)} \dots \mathcal{G}_{:v_d:}^{(d)}).$$

By the cyclic property of the trace, we can isolate the  $k$ -th factor:

$$\mathcal{X}_{v_1, \dots, v_d} = \text{trace}(\mathbf{M}_{(-k)} \cdot \mathcal{G}_{:v_k:}^{(k)}),$$

where

$$\mathbf{M}_{(-k)} = \mathcal{G}_{:v_{k+1}:}^{(k+1)} \dots \mathcal{G}_{:v_d:}^{(d)} \mathcal{G}_{:v_1:}^{(1)} \dots \mathcal{G}_{:v_{k-1}:}^{(k-1)} \in \mathbb{R}^{r_{k+1} \times r_k}.$$

For fixed indices  $\{v_j\}_{j \neq k}$ , the matrix  $\mathbf{M}_{(-k)}$  is constant with respect to  $v_k$ . Expanding the trace gives

$$\mathcal{X}_{v_1, \dots, v_d} = \sum_{p=1}^{r_k} \sum_{q=1}^{r_{k+1}} [\mathbf{M}_{(-k)}]_{q,p} \mathcal{G}_{p,v_k,q}^{(k)}.$$

Applying the mode- $k$  DFT along the  $k$ -th dimension, we obtain

$$\begin{aligned} & (\mathcal{F}_k[\mathcal{X}])_{v_1, \dots, \omega_k, \dots, v_d} \\ &= \sum_{v_k=1}^{n_k} \mathcal{X}_{v_1, \dots, v_k, \dots, v_d} \cdot [\mathbf{F}_k]_{v_k, \omega_k} \end{aligned}$$

$$\begin{aligned} &= \sum_{v_k=1}^{n_k} \left( \sum_{p=1}^{r_k} \sum_{q=1}^{r_{k+1}} [\mathbf{M}_{(-k)}]_{q,p} \cdot \mathcal{G}_{p,v_k,q}^{(k)} \right) \cdot [\mathbf{F}_k]_{v_k, \omega_k} \\ &= \sum_{p=1}^{r_k} \sum_{q=1}^{r_{k+1}} [\mathbf{M}_{(-k)}]_{q,p} \cdot \left( \sum_{v_k=1}^{n_k} \mathcal{G}_{p,v_k,q}^{(k)} \cdot [\mathbf{F}_k]_{v_k, \omega_k} \right). \end{aligned}$$

Using the definition of mode-2 DFT for the TR factor  $\mathcal{G}^{(k)}$ ,

$$(\mathcal{F}_2[\mathcal{G}^{(k)}])_{p, \omega_k, q} = \sum_{v_k=1}^{n_k} \mathcal{G}_{p,v_k,q}^{(k)} \cdot [\mathbf{F}_k]_{v_k, \omega_k},$$

we can rewrite the expression as

$$\begin{aligned} & (\mathcal{F}_k[\mathcal{X}])_{v_1, \dots, \omega_k, \dots, v_d} \\ &= \sum_{p=1}^{r_k} \sum_{q=1}^{r_{k+1}} [\mathbf{M}_{(-k)}]_{q,p} \cdot (\mathcal{F}_2[\mathcal{G}^{(k)}])_{p, \omega_k, q}. \end{aligned}$$

We now bound the magnitude of this term. Using the triangle inequality:

$$\begin{aligned} & \left| (\mathcal{F}_k[\mathcal{X}])_{v_1, \dots, \omega_k, \dots, v_d} \right| \\ & \leq \sum_{p=1}^{r_k} \sum_{q=1}^{r_{k+1}} |[\mathbf{M}_{(-k)}]_{q,p}| \cdot \left| (\mathcal{F}_2[\mathcal{G}^{(k)}])_{p, \omega_k, q} \right|. \end{aligned}$$

By the assumption on  $\mathcal{G}^{(k)}$ , for all  $|\omega_k| > \Omega_k$ , we have

$$\left| (\mathcal{F}_2[\mathcal{G}^{(k)}])_{p, \omega_k, q} \right| \leq \epsilon.$$

Substituting this bound:

$$\left| (\mathcal{F}_k[\mathcal{X}])_{v_1, \dots, \omega_k, \dots, v_d} \right| \leq \epsilon \cdot \left( \sum_{p=1}^{r_k} \sum_{q=1}^{r_{k+1}} |[\mathbf{M}_{(-k)}]_{q,p}| \right).$$

Defining the constant  $c_k$  as the maximum possible sum of magnitudes of the product of the remaining cores:

$$c_k := \max_{\{v_j\}_{j \neq k}} \sum_{p=1}^{r_k} \sum_{q=1}^{r_{k+1}} |[\mathbf{M}_{(-k)}]_{q,p}|,$$

we obtain the final bound for the infinity norm over the spatial indices  $\{v_j\}_{j \neq k}$ :

$$\|(\mathcal{F}_k[\mathcal{X}])_{:\omega_k}\|_\infty \leq c_k \epsilon, \quad \forall |\omega_k| > \Omega_k.$$

This completes the proof.  $\square$

**Theorem 2.** Consider a TR factor  $\mathcal{G}$  reparameterized as  $\mathcal{G} = \mathcal{C} \times_3 \mathbf{B}$ , where  $\mathcal{C} \in \mathbb{R}^{r_1 \times n \times R_2}$  is a trainable tensor and  $\mathbf{B} \in \mathbb{R}^{r_2 \times R_2}$  is a fixed basis. Let  $\mathcal{L}(\omega)$  be the loss associated with frequency  $\omega$ . For any  $\omega_{\text{high}} > \omega_{\text{low}} > 0$ , given any  $\epsilon \geq 0$ , and fixed indices  $p, q$  with  $1 \leq p \leq r_1$  and  $1 \leq q \leq n$ , there exists a matrix  $\mathbf{B}$  such that for all  $s = 1, \dots, R_2$ ,

$$\left| \frac{\partial \mathcal{L}(\omega_{\text{high}})}{\partial \mathcal{C}_{pqs}} / \frac{\partial \mathcal{L}(\omega_{\text{low}})}{\partial \mathcal{C}_{pqs}} \right| \geq \max_{j=1, \dots, r_2} \left| \frac{\partial \mathcal{L}(\omega_{\text{high}})}{\partial \mathcal{G}_{pqj}} / \frac{\partial \mathcal{L}(\omega_{\text{low}})}{\partial \mathcal{G}_{pqj}} \right| - \epsilon.$$

*Proof.* First, from the reparameterization  $\mathcal{G} = \mathcal{C} \times_3 \mathbf{B}$ , we have

$$\mathcal{G}_{pqj} = \sum_{s=1}^{R_2} \mathcal{C}_{pqs} \mathbf{B}_{js},$$

Viewing  $\mathcal{G}_{pq1}, \dots, \mathcal{G}_{pqR_2}$  as latent variables dependent on  $\mathcal{C}_{pqs}$ , by the chain rule we obtain

$$\frac{\partial \mathcal{L}(\omega)}{\partial \mathcal{C}_{pqs}} = \sum_{t=1}^{r_2} \frac{\partial \mathcal{L}(\omega)}{\partial \mathcal{G}_{pqt}} \mathbf{B}_{ts}.$$

Next, given two frequencies  $\omega_{\text{high}} > \omega_{\text{low}} > 0$  and fixed fiber indices  $p, q$ , define

$$\tau = \operatorname{argmax}_j \left| \frac{\partial \mathcal{L}(\omega_{\text{high}})}{\partial \mathcal{G}_{pqj}} / \frac{\partial \mathcal{L}(\omega_{\text{low}})}{\partial \mathcal{G}_{pqj}} \right|.$$

By the triangle inequality, we have

$$\begin{aligned} & \left| \frac{\partial \mathcal{L}(\omega_{\text{high}})}{\partial \mathcal{C}_{pqs}} / \frac{\partial \mathcal{L}(\omega_{\text{low}})}{\partial \mathcal{C}_{pqs}} \right| \\ &= \left| \frac{\frac{\partial \mathcal{L}(\omega_{\text{high}})}{\partial \mathcal{G}_{pqt}} \mathbf{B}_{\tau s} + \sum_{t \neq \tau} \frac{\partial \mathcal{L}(\omega_{\text{high}})}{\partial \mathcal{G}_{pqt}} \mathbf{B}_{ts}}{\frac{\partial \mathcal{L}(\omega_{\text{low}})}{\partial \mathcal{G}_{pqt}} \mathbf{B}_{\tau s} + \sum_{t \neq \tau} \frac{\partial \mathcal{L}(\omega_{\text{low}})}{\partial \mathcal{G}_{pqt}} \mathbf{B}_{ts}} \right| \\ &\geq \frac{\left| \frac{\partial \mathcal{L}(\omega_{\text{high}})}{\partial \mathcal{G}_{pqt}} \mathbf{B}_{\tau s} \right| - \left| \sum_{t \neq \tau} \frac{\partial \mathcal{L}(\omega_{\text{high}})}{\partial \mathcal{G}_{pqt}} \mathbf{B}_{ts} \right|}{\left| \frac{\partial \mathcal{L}(\omega_{\text{low}})}{\partial \mathcal{G}_{pqt}} \mathbf{B}_{\tau s} \right| + \left| \sum_{t \neq \tau} \frac{\partial \mathcal{L}(\omega_{\text{low}})}{\partial \mathcal{G}_{pqt}} \mathbf{B}_{ts} \right|}. \end{aligned}$$

For the elements of  $\mathbf{B}$ , construct  $\mathbf{B}_{ts}$  such that for  $s = 1, \dots, R_2$ ,  $|\mathbf{B}_{ts}| \leq \alpha$  when  $t \neq \tau$  and  $\mathbf{B}_{\tau s} = 1$ , where  $\alpha > 0$  is a positive upper bound. Define

$$M_1 = \sum_{t \neq \tau} \left| \frac{\partial \mathcal{L}(\omega_{\text{high}})}{\partial \mathcal{G}_{pqt}} \right|, \quad M_2 = \sum_{t \neq \tau} \left| \frac{\partial \mathcal{L}(\omega_{\text{low}})}{\partial \mathcal{G}_{pqt}} \right|.$$

Without loss of generality, for any  $\epsilon \geq 0$ , choose

$$\alpha \leq \min \left\{ \frac{\left| \frac{\partial \mathcal{L}(\omega_{\text{low}})}{\partial \mathcal{G}_{pqt}} \right| \epsilon}{M_1 + M_2 \left| \frac{\partial \mathcal{L}(\omega_{\text{high}})}{\partial \mathcal{G}_{pqt}} / \frac{\partial \mathcal{L}(\omega_{\text{low}})}{\partial \mathcal{G}_{pqt}} \right| - M_2 \epsilon}, \frac{1}{M_1} \left| \frac{\partial \mathcal{L}(\omega_{\text{high}})}{\partial \mathcal{G}_{pqt}} \right| \right\}.$$

From the upper bound on  $\alpha$ , it holds that

$$\left| \sum_{t \neq \tau} \frac{\partial \mathcal{L}(\omega_{\text{high}})}{\partial \mathcal{G}_{pqt}} \mathbf{B}_{ts} \right| \leq \alpha M_1 \leq \left| \frac{\partial \mathcal{L}(\omega_{\text{high}})}{\partial \mathcal{G}_{pqt}} \right|,$$

which implies

$$\left| \frac{\partial \mathcal{L}(\omega_{\text{high}})}{\partial \mathcal{G}_{pq\tau}} \right| - \left| \sum_{t \neq \tau} \frac{\partial \mathcal{L}(\omega_{\text{high}})}{\partial \mathcal{G}_{pqt}} \mathbf{B}_{ts} \right| \geq 0.$$

Thus, for fixed  $p, q$  and for  $s = 1, \dots, R_2$ , we get

$$\begin{aligned} & \left| \frac{\partial \mathcal{L}(\omega_{\text{high}})}{\partial \mathcal{C}_{pqs}} / \frac{\partial \mathcal{L}(\omega_{\text{low}})}{\partial \mathcal{C}_{pqs}} \right| \\ &\geq \frac{\left| \frac{\partial \mathcal{L}(\omega_{\text{high}})}{\partial \mathcal{G}_{pq\tau}} \right| - \alpha M_1}{\left| \frac{\partial \mathcal{L}(\omega_{\text{low}})}{\partial \mathcal{G}_{pq\tau}} \right| + \alpha M_2} \\ &\geq \frac{\left| \frac{\partial \mathcal{L}(\omega_{\text{high}})}{\partial \mathcal{G}_{pq\tau}} \right| - \epsilon \left| \frac{\partial \mathcal{L}(\omega_{\text{low}})}{\partial \mathcal{G}_{pq\tau}} \right|}{\left| \frac{\partial \mathcal{L}(\omega_{\text{low}})}{\partial \mathcal{G}_{pq\tau}} \right|} \\ &= \max_{j=1, \dots, r_2} \left| \frac{\partial \mathcal{L}(\omega_{\text{high}})}{\partial \mathcal{G}_{pqj}} / \frac{\partial \mathcal{L}(\omega_{\text{low}})}{\partial \mathcal{G}_{pqj}} \right| - \epsilon. \end{aligned}$$

The second inequality is obtained by applying the first upper bound of  $\alpha$ . This completes the proof.  $\square$

**Remark.** We note that the proof of Theorem 2 provides an existence guarantee, demonstrating that a suitable choice of  $\mathbf{B}$  can in principle amplify high-frequency gradients. However, the specific construction in the proof is not employed in practice, as the optimal index  $\tau$  is dynamic and depends on the data, making it infeasible to pre-specify. Instead, we adopt the principled Xavier-style initialization described in Theorem 3, which preserves variance in both forward and backward passes. This provides a stable starting point for optimization while allowing the model to learn from a fully expressive random state.

**Theorem 3.** Suppose the entries of  $\mathbf{B}^{(k)}$  in the reparameterized TR factor are sampled independently from a uniform distribution as

$$\mathbf{B}_{ij}^{(k)} \sim \mathcal{U} \left( -\sqrt{\frac{6}{r_{k+1} + R_{k+1}}}, \sqrt{\frac{6}{r_{k+1} + R_{k+1}}} \right), \forall i, j, k,$$

then the variances in both the forward and backward passes are preserved.

*Proof.* We derive the variance of the initialization parameter  $\sigma_{\mathbf{B}}^2$  by enforcing variance preservation in both the forward and backward passes.

**Forward pass.** Each element of  $\mathcal{G}^{(k)}$  is computed as

$$\mathcal{G}_{pqj}^{(k)} = \sum_{s=1}^{R_{k+1}} \mathcal{C}_{pqs}^{(k)} \mathbf{B}_{js}^{(k)}.$$

Since both  $\mathcal{C}^{(k)}$  and  $\mathbf{B}^{(k)}$  are zero-mean and independent, the variance of  $\mathcal{G}_{pqj}^{(k)}$  is

$$\operatorname{Var}(\mathcal{G}_{pqj}^{(k)}) = R_{k+1} \sigma_{\mathcal{C}}^2 \sigma_{\mathbf{B}}^2.$$

To maintain signal variance, we require that

$$\text{Var}(\mathcal{G}_{pgj}^{(k)}) = \text{Var}(\mathcal{C}_{pqj}^{(k)}) = \sigma_{\mathcal{C}}^2,$$

which gives

$$\sigma_{\mathbf{B}}^2 = \frac{1}{\hat{R}_{i+1}}.$$

**Backward pass.** During backpropagation, the gradient of the loss function with respect to  $\mathcal{C}_{pqj}^{(k)}$  is

$$\frac{\partial \mathcal{L}}{\partial \mathcal{C}_{pqj}^{(k)}} = \sum_{t=1}^{r_{k+1}} \frac{\partial \mathcal{L}}{\partial \mathcal{G}_{pqt}^{(k)}} \frac{\partial \mathcal{G}_{pqt}^{(k)}}{\partial \mathcal{C}_{pqj}^{(k)}} = \sum_{t=1}^{r_{k+1}} \frac{\partial \mathcal{L}}{\partial \mathcal{G}_{pqt}^{(k)}} \mathbf{B}_{ts}^{(k)}.$$

Assuming i.i.d. gradients with  $\text{Var}\left(\frac{\partial \mathcal{L}}{\partial \mathcal{G}_{pqt}^{(k)}}\right) = \sigma_{\nabla \mathcal{G}}^2$ , we obtain

$$\text{Var}\left(\frac{\partial \mathcal{L}}{\partial \mathcal{C}_{pqj}^{(k)}}\right) = R_{i+1} \sigma_{\nabla \mathcal{G}}^2 \sigma_{\mathbf{B}}^2.$$

To preserve the variance of the backpropagated gradients, we require

$$\sigma_{\mathbf{B}}^2 = \frac{1}{R_{i+1}}.$$

Following the principle of Xavier Glorot initialization [9], which balances the forward and backward variance constraints, we take the harmonic mean of the two bounds, yielding

$$\sigma_{\mathbf{B}}^2 = \frac{2}{r_{k+1} + R_{k+1}}.$$

Since a zero-mean uniform distribution  $\mathcal{U}(-a, a)$  has variance  $\text{Var} = a^2/3$ , setting  $a = \sqrt{6/(r_{k+1} + R_{k+1})}$  makes its variance exactly equal to  $\sigma_{\mathbf{B}}^2$ , yielding the final form

$$\mathbf{B}_{ij}^{(k)} \sim \mathcal{U}\left(-\sqrt{\frac{6}{r_{k+1} + R_{k+1}}}, \sqrt{\frac{6}{r_{k+1} + R_{k+1}}}\right), \quad \forall i, j, k,$$

which completes the proof.  $\square$

**Remark.** The analysis in Theorem 3 is not restricted to Xavier initialization and naturally extends to other variance-preserving schemes. In particular, enforcing forward-pass variance preservation under Kaiming initialization yields  $\mathbf{B}_{ij}^{(k)} \sim \mathcal{U}\left(-\sqrt{\frac{6}{R_{k+1}}}, \sqrt{\frac{6}{R_{k+1}}}\right)$ . Numerical results are provided in Section C.

**Theorem 4.** Let  $g_{\phi}(\mathbf{v}) : \mathbb{R}^d \rightarrow \mathbb{R}$  be defined as

$$g_{\phi}(\mathbf{v}) = \Phi(g_{\phi_1}(v_1) \times_3 \mathbf{B}^{(1)}, \dots, g_{\phi_d}(v_d) \times_3 \mathbf{B}^{(d)}),$$

where  $\mathbf{v} = [v_1, \dots, v_d]^T \in \mathbb{R}^d$  denotes the coordinate vector, and each  $\mathbf{B}^{(k)} \in \mathbb{R}^{r_{k+1} \times R_{k+1}}$  is a fixed basis. Assume for each mode  $k = 1, \dots, d$ , the following conditions hold:

- $g_{\phi_k}(\cdot)$  is an  $L_k$ -layer MLP with activation function  $\sigma(\cdot)$  that is  $\kappa$ -Lipschitz continuous;

- the spectral norm of each weight matrix in  $g_{\phi_k}(\cdot)$  is bounded by  $\eta$ ;
  - the output is bounded:  $\sup_{v_k} \|g_{\phi_k}(v_k)\|_F \leq C_k < \infty$ .
- Then,  $g_{\phi}(\mathbf{v})$  is globally Lipschitz continuous, i.e.,

$$|g_{\phi}(\mathbf{v}) - g_{\phi}(\mathbf{v}')| \leq \delta \|\mathbf{v} - \mathbf{v}'\|_2,$$

where the global Lipschitz constant  $\delta = \sqrt{\sum_{k=1}^d \delta_k^2}$ , and  $\delta_k = (\kappa\eta)^{L_k} \cdot \|\mathbf{B}_k\|_2 \cdot \left(\prod_{j \neq k} C_j\right)$ .

*Proof.* For the  $i$ -th layer of the  $k$ -th MLP, defined as

$$g_i^{(k)}(\mathbf{x}) = \sigma(\mathbf{W}_i \mathbf{x} + \mathbf{b}_i),$$

the Lipschitz constant is bounded by the product of the activation's constant and the affine transformation's constant:

$$L(g_i^{(k)}) \leq L(\sigma) \cdot L(\mathbf{W}_i \mathbf{x} + \mathbf{b}_i) \leq \kappa \cdot \|\mathbf{W}_i\|_2 \leq \kappa\eta.$$

Hence, for an  $L_k$ -layer MLP  $g_{\phi_k}$ , the overall Lipschitz constant satisfies

$$L_g^{(k)} \leq \prod_{i=1}^{L_k} L(g_i^{(k)}) \leq (\kappa\eta)^{L_k}.$$

We then have

$$\begin{aligned} & \left\| \mathcal{G}_{:v_k}^{(k)} - \mathcal{G}_{:v'_k}^{(k)} \right\|_F \\ &= \|g_{\phi_k}(v_k) \times_3 \mathbf{B}^{(k)} - g_{\phi_k}(v'_k) \times_3 \mathbf{B}^{(k)}\|_F \\ &= \|(g_{\phi_k}(v_k) - g_{\phi_k}(v'_k)) \times_3 \mathbf{B}^{(k)}\|_F \\ &\leq \|g_{\phi_k}(v_k) - g_{\phi_k}(v'_k)\|_F \cdot \|\mathbf{B}_k\|_2 \\ &\leq (\kappa\eta)^{L_k} \|\mathbf{B}_k\|_2 \cdot |v_k - v'_k|. \end{aligned}$$

Let  $\mathbf{G}_{v_k}^{(k)} = \mathcal{G}_{:v_k}^{(k)} \in \mathbb{R}^{r_k \times r_{k+1}}$ ,  $\mathbf{M}_{(-k)} = \mathbf{G}_{v_{k+1}}^{(k+1)} \dots \mathbf{G}_{v_d}^{(d)} \mathbf{G}_{v_1}^{(1)} \dots \mathbf{G}_{v_{k-1}}^{(k-1)} \in \mathbb{R}^{r_{k+1} \times r_k}$ , and denote by  $\mathbf{v}'_k = (v_1, \dots, v_{k-1}, v'_k, v_{k+1}, \dots, v_d)$  the coordinate vector differing from  $\mathbf{v}$  only at the  $k$ -th entry. Then,

$$\begin{aligned} & |g_{\phi}(\mathbf{v}) - g_{\phi}(\mathbf{v}')| \\ &= \left| \text{trace}\left(\mathbf{M}_{(-k)} \cdot \mathbf{G}_{v_k}^{(k)}\right) - \text{trace}\left(\mathbf{M}_{(-k)} \cdot \mathbf{G}_{v'_k}^{(k)}\right) \right| \\ &\leq \|\mathbf{M}\|_F \cdot \left\| \mathbf{G}_{v_k}^{(k)} - \mathbf{G}_{v'_k}^{(k)} \right\|_F \\ &\leq \prod_{j \neq k} \left\| \mathbf{G}_{v_j}^{(j)} \right\|_F \cdot \left\| \mathcal{G}_{:v_k}^{(k)} - \mathcal{G}_{:v'_k}^{(k)} \right\|_F \\ &\leq (\kappa\eta)^{L_k} \cdot \|\mathbf{B}_k\|_2 \cdot \prod_{j \neq k} C_j \cdot |v_k - v'_k|. \end{aligned}$$

Aggregating across all dimensions yields

$$\begin{aligned} & |g_{\phi}(\mathbf{v}) - g_{\phi}(\mathbf{v}')| \\ &\leq \sum_{k=1}^d |g_{\phi}(\mathbf{v}) - g_{\phi}(\mathbf{v}'_k)| \\ &\leq \sum_{k=1}^d (\kappa\eta)^{L_k} \cdot \|\mathbf{B}_k\|_2 \cdot \prod_{j \neq k} C_j \cdot |v_k - v'_k|. \end{aligned}$$

Finally, applying the Cauchy–Schwarz inequality gives

$$\begin{aligned} & |g_\phi(\mathbf{v}) - g_\phi(\mathbf{v}')| \\ & \leq \sqrt{\sum_{k=1}^d \left( (\kappa\eta)^{L_k} \cdot \|\mathbf{B}_k\|_2 \cdot \prod_{j \neq k} C_j \right)^2} \cdot \|\mathbf{v} - \mathbf{v}'\|_2, \end{aligned}$$

which completes the proof.  $\square$

## B. Task-Specific Losses and Settings

In this section, we provide the loss formulations and hyperparameter settings for the four tasks studied in our experiments. Recall that

$$g_\phi(\{\mathbf{v}_k\}_{k=1}^d) = \Phi(g_{\phi_1}(\mathbf{v}_1) \times_3 \mathbf{B}^{(1)}, \dots, g_{\phi_d}(\mathbf{v}_d) \times_3 \mathbf{B}^{(d)})$$

denotes the RepTRFD reconstruction with learnable parameters  $\phi$  and fixed bases  $\{\mathbf{B}^{(k)}\}_{k=1}^d$ . The main hyperparameters in our model include the TR rank  $[r_1, \dots, r_d]$ , the latent tensor expansion factor  $\beta$ , the frequency parameter  $\omega_0$  for the sinusoidal mapping, and the number of layers in each branch network. Each task is formulated as a single optimization problem minimizing a combination of a data fidelity term and an optional regularization term.

**Image and Video Inpainting**, which aims to reconstruct missing regions from partially observed visual data:

$$\begin{aligned} \min_{\phi} \|\mathcal{P}_\Omega(g_\phi(\{\mathbf{v}_k\}_{k=1}^d) - \mathcal{O})\|_F^2 + \gamma_1 \|g_\phi(\{\mathbf{v}_k\}_{k=1}^d)\|_{\text{TV}} \\ + \gamma_2 \|g_\phi(\{\mathbf{v}_k\}_{k=1}^d)\|_{\text{SSTV}}, \end{aligned}$$

where  $\mathcal{O}$  is the observed incomplete data, and  $\mathcal{P}_\Omega(\cdot)$  denotes projection onto observed entries. The total variation (TV) is defined along spatial dimensions as  $\|\mathcal{X}\|_{\text{TV}} = \|\nabla_{v_1} \mathcal{X}\|_1 + \|\nabla_{v_2} \mathcal{X}\|_1$ , and the spatial-spectral TV (SSTV) involves the spectral dimension, defined as  $\|\mathcal{X}\|_{\text{SSTV}} = \|\nabla_{v_1} \nabla_{v_3} \mathcal{X}\|_1 + \|\nabla_{v_2} \nabla_{v_3} \mathcal{X}\|_1$ . For all modes  $k$ ,  $r_k = 20$  and  $\beta = 10$ . Frequency parameter  $\omega_0$  is set to 90 for color images and videos, and 120 for MSIs and HSIs. Branch layers  $[L_1, L_2, L_3]$  are set to  $[1, 1, 2]$  for color images and videos, and  $[1, 1, 1]$  for MSIs and HSIs. Regularization parameters are set as follows:  $\gamma_1 = \gamma_2 = 5 \times 10^{-5}$  for color images;  $\gamma_1 = 5 \times 10^{-5}$  and  $\gamma_2 = 5 \times 10^{-4}$  for MSIs and videos;  $\gamma_1 = 5 \times 10^{-6}$  and  $\gamma_2 = 5 \times 10^{-5}$  for HSIs.

**Image Denoising**, which aims to recover clean images from noisy observations:

$$\begin{aligned} \min_{\phi} \|g_\phi(\{\mathbf{v}_k\}_{k=1}^d) - \mathcal{O}\|_F^2 + \gamma_1 \|g_\phi(\{\mathbf{v}_k\}_{k=1}^d)\|_{\text{TV}} \\ + \gamma_2 \|g_\phi(\{\mathbf{v}_k\}_{k=1}^d)\|_{\text{SSTV}}, \end{aligned}$$

where  $\mathcal{O}$  is the observed noisy data. For all modes  $k$ ,  $r_k = 16$  and  $\beta = 5$ . Frequency parameter  $\omega_0$  is set to

120, and branch layers  $[L_1, L_2, L_3]$  are  $[1, 1, 2]$ . Regularization weights are set as  $\gamma_1 = \gamma_2 = 10^{-4}$  for MSIs and  $\gamma_1 = \gamma_2 = 10^{-5}$  for HSIs.

**Image Super-Resolution**, which seeks to reconstruct high-resolution images from their low-resolution counterparts:

$$\min_{\phi} \|\text{Down}(g_\phi(\{\mathbf{v}_k\}_{k=1}^d)) - \mathcal{O}\|_F^2 + \gamma_1 \|g_\phi(\{\mathbf{v}_k\}_{k=1}^d)\|_{\text{TV}},$$

where  $\text{Down}(\cdot)$  is the downsampling operator and  $\mathcal{O}$  is the low-resolution observation. For all modes  $k$ ,  $r_k = 20$  and  $\beta = 10$ . Frequency parameter  $\omega_0$  is set to 90, branch layers  $[L_1, L_2, L_3]$  are  $[1, 1, 2]$ , and  $\gamma_1 = 5 \times 10^{-5}$ .

**Point Cloud Recovery**, which aims to infer continuous point-wise attributes from partially observed point cloud data:

$$\min_{\phi} \sum_{k=1}^N (g_\phi(\mathbf{v}_k) - \mathbf{O}_{k,5})^2,$$

where the observed data  $\mathbf{O} \in \mathbb{R}^{N \times 5}$  contains  $N$  points, with each row encoding spatial coordinates  $(x, y, z)$ , color information  $c$ , and a scalar value  $s$ . Here,  $\mathbf{v}_k = (x_k, y_k, z_k, c_k)$  is the input coordinate-color vector of the  $k$ -th point, and  $\mathbf{O}_{k,5}$  is the corresponding observed scalar value. For all modes  $k$ ,  $r_k = 20$  and  $\beta = 3$ . Frequency parameter  $\omega_0$  is set to 240, and all branches use a single layer.

## C. Supplementary Experimental Results

### C.1. Additional Ablation Studies

**Effectiveness of the Fixed Basis Strategy.** To validate the necessity of a fixed basis, we compare our proposed strategy with a variant where the basis matrices are treated as learnable parameters. As illustrated in Fig. S1, although both methods exhibit similar convergence speeds in the early stage, they diverge significantly in later iterations. The learnable basis model reaches a lower peak PSNR and subsequently suffers from performance degradation. This phenomenon suggests that allowing basis matrices to vary introduces excessive degrees of freedom, causing the model to overfit high-frequency noise or drift away from the variance-preserving initialization. In contrast, our fixed basis strategy acts as a structural regularizer, maintaining improved stability and consistently higher reconstruction quality throughout the training process.

**Hyperparameter Sensitivity Analysis.** We investigate the sensitivity of two key hyperparameters in our framework, the TR rank and the frequency scaling parameter  $\omega_0$ . Experiments are conducted on the MSI datasets *Toy* and *Face* for denoising with  $\text{SD} = 0.2$ . Fig. S2 presents the variation of PSNR with different values of these hyperparameters. The results indicate that our method is relatively robust to the

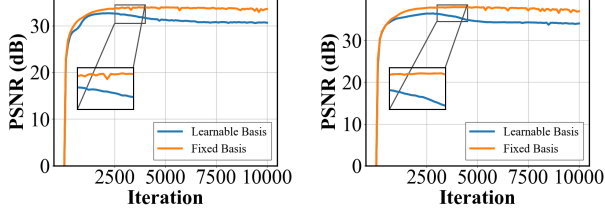

Figure S1. Impact of the fixed basis strategy on denoising performance for the MSIs *Toy* (left) and *Face* (right) with  $SD = 0.2$ .

choice of both the TR rank and  $\omega_0$ , maintaining high reconstruction quality across a wide range of settings. In addition, we examine the interaction between the regularization parameter  $\beta$  and the frequency scaling parameter  $\omega_0$ . As shown in Fig. S3, RepTRFD maintains stable performance over a broad range of parameter combinations.

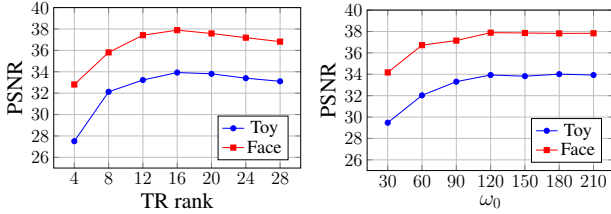

Figure S2. PSNR variation with TR rank and frequency scaling  $\omega_0$  for MSI denoising on *Toy* (left) and *Face* (right) datasets with  $SD = 0.2$ .

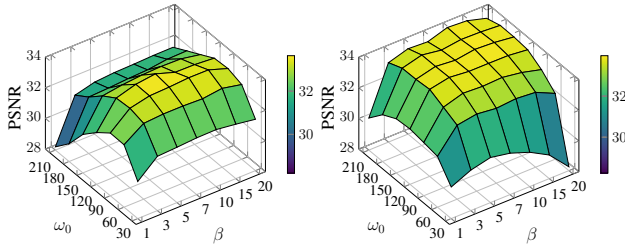

Figure S3. PSNR sensitivity to hyperparameters  $\beta$  and  $\omega_0$  for inpainting on *Airplane* ( $SR = 0.3$ ) (left) and denoising on *Toy* ( $SD = 0.2$ ) (right).

**Impact of Explicit Regularization.** To disentangle the effect of our reparameterized architecture from that of explicit smoothness priors, we further evaluate a variant of RepTRFD trained solely with a data fidelity loss, i.e., without incorporating TV or SSTV regularization. We conduct experiments on both inpainting and super-resolution tasks, contrasting performance against the representative functional tensor baseline, LRTFR [21]. As reported in Tables S1 and S2, even without explicit regularization, our method yields significant PSNR gains over LRTFR across all datasets. This demonstrates the inherent advantage of the proposed reparameterization scheme in capturing latent structures. When regularization is incorporated, per-

formance is further boosted, confirming its complementary role in enhancing spatial smoothness and mitigating artifacts. These results collectively verify that the primary performance improvement stems from the RepTRFD architecture itself, while explicit regularization serves as an effective refinement mechanism.

Table S1. PSNR comparison on image and video inpainting at  $SR = 0.2$  under different regularization settings.

| Data            | LRTFR (Baseline) | RepTRFD (w/o TV) | RepTRFD (w/ TV) |
|-----------------|------------------|------------------|-----------------|
| <i>Airplane</i> | 27.21            | 29.37            | <b>30.45</b>    |
| <i>Flowers</i>  | 44.27            | 48.53            | <b>50.13</b>    |
| <i>Botswana</i> | 41.86            | 44.94            | <b>45.27</b>    |
| <i>Carphone</i> | 30.18            | 31.86            | <b>32.58</b>    |

Table S2. PSNR comparison on  $\times 4$  image super-resolution under different regularization settings.

| Data          | LRTFR (Baseline) | RepTRFD (w/o TV) | RepTRFD (w/ TV) |
|---------------|------------------|------------------|-----------------|
| <i>Lion</i>   | 28.10            | 30.37            | <b>31.01</b>    |
| <i>Parrot</i> | 27.81            | 29.79            | <b>30.39</b>    |

**Convergence Behavior.** To evaluate the effect of the proposed reparameterization on optimization efficiency, we compare the training loss curves of TRFD, LRTFR, and RepTRFD under matched parameter budgets. Fig. S4 shows the training loss curves of TRFD, LRTFR, and RepTRFD under matched parameter settings. RepTRFD converges faster and reaches a lower loss, demonstrating improved convergence behavior.

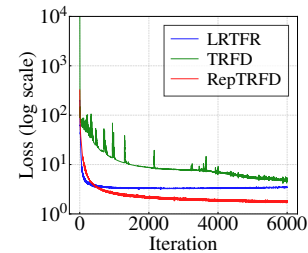

Figure S4. Loss curve on the color image *Airplane* ( $SR = 0.3$ ).

**Initialization Scheme.** To examine whether the theoretical analysis depends on a specific variance-preserving strategy, we further compare Xavier and Kaiming initialization schemes. Under Kaiming initialization with forward-pass variance preservation, the basis entries follow  $\mathbf{B}_{ij}^{(k)} \sim \mathcal{U}\left(-\sqrt{\frac{6}{R_{k+1}}}, \sqrt{\frac{6}{R_{k+1}}}\right)$ . Table S3 reports the reconstruction performance on four datasets with  $SR = 0.2$ . We observe that the two initialization strategies yield highly comparable results across all datasets, with only marginal differences. This indicates that our framework is robust to the specific choice of variance-preserving initialization and that

the theoretical analysis naturally extends beyond Xavier initialization.

Table S3. PSNR results of different variance-preserving initialization schemes on multiple datasets with  $SR = 0.2$ .

| Scheme  | <i>Airplane</i> | <i>Toy</i>   | <i>Botswana</i> | <i>News</i>  |
|---------|-----------------|--------------|-----------------|--------------|
| Kaiming | 30.23           | 48.59        | <b>45.30</b>    | 34.75        |
| Xavier  | <b>30.45</b>    | <b>48.67</b> | 45.27           | <b>34.90</b> |

## C.2. Extended Experimental Results

**Extended Inpainting Results.** To provide a more comprehensive evaluation, we further include extensive qualitative and quantitative comparisons under various SRs and across diverse data modalities. As shown in Fig. S5, we visualize representative inpainting results on RGB, MSI, HSI, and video datasets, covering a wide range of missing patterns and SRs. The visual comparisons consistently demonstrate that our method yields clearer structural details and fewer artifacts compared to existing approaches. For quantitative evaluation, we report full numerical results of color image inpainting in Table S4, and summarize results on MSI, HSI, and video sequences in Table S5. These results further confirm the robustness and superiority of our method.

**Extended Denoising Results.** We further conduct denoising experiments on MSI and HSI data under different noise levels, where Gaussian noise with SD ranging from 0.1 to 0.3 is added independently to all pixels and spectral bands. Fig. S6 provides visual comparisons across MSI (*Toys, Balloons*) and HSI scenes (*KSC, Indian Pines*), showing that our method restores cleaner structural details and yields fewer spectral distortions. Corresponding quantitative results are summarized in Table S6, where PSNR, SSIM, and NRMSE are reported across different SD settings.

**Extended Super-Resolution Results.** To further demonstrate the generalization ability of RepTRFD in recovering fine structural details under high upscaling factors, we provide additional  $\times 4$  visual super-resolution results on the DIV2K dataset, as shown in Fig. S7. Compared with both INR (PEMLP [25], SIREN [37], Gauss [30], WIRE [33], and FINER [17]) and tensor functional representation methods (LRTFR [21]), our approach produces sharper edges, cleaner texture patterns, and fewer artifacts. The quantitative results (PSNR/SSIM) shown above each image further verify the visual comparisons, where RepTRFD consistently achieves the best performance across all samples.

**Extended Point Cloud Recovery Results.** Fig. S8 presents extended visual results for point cloud recovery under different SRs. We compare the proposed RepTRFD with several INR (PEMLP [25], SIREN [37], Gauss [30], WIRE [33], and FINER [17]) and tensor functional representation methods (LRTFR [21]). Across all tested SRs,

our method consistently reconstructs more accurate surface geometry and fine structures, as reflected by the lower NRMSE values shown above each reconstruction. These results demonstrate the superior performance of RepTRFD in point cloud recovery.

Table S4. Quantitative comparison on color images. PSNR, SSIM, and NRMSE are reported under different SRs.

| Data     | Method  | SR = 0.05    |              |              | SR = 0.1     |              |              | SR = 0.15    |              |              | SR = 0.2     |              |              | SR = 0.25    |              |              | SR = 0.3     |              |              |
|----------|---------|--------------|--------------|--------------|--------------|--------------|--------------|--------------|--------------|--------------|--------------|--------------|--------------|--------------|--------------|--------------|--------------|--------------|--------------|
|          |         | PSNR         | SSIM         | NRMSE        |
| Airplane | TRLRF   | 15.08        | 0.172        | 0.218        | 17.98        | 0.347        | 0.156        | 19.90        | 0.444        | 0.125        | 21.50        | 0.529        | 0.104        | 23.35        | 0.623        | 0.084        | 25.58        | 0.712        | 0.065        |
|          | FCTN    | 14.64        | 0.219        | 0.229        | 17.79        | 0.370        | 0.159        | 20.05        | 0.504        | 0.123        | 22.08        | 0.600        | 0.097        | 24.11        | 0.689        | 0.077        | 25.70        | 0.747        | 0.064        |
|          | HLRTF   | 18.46        | 0.396        | 0.148        | 21.89        | 0.598        | 0.099        | 24.82        | 0.746        | 0.071        | 26.77        | 0.811        | 0.057        | 27.61        | 0.795        | 0.051        | 29.40        | 0.852        | 0.042        |
|          | LRTFR   | 19.66        | 0.499        | 0.129        | 22.09        | 0.655        | 0.097        | 25.57        | 0.765        | 0.065        | 27.21        | 0.822        | 0.054        | 28.60        | 0.858        | 0.046        | 29.38        | 0.878        | 0.042        |
|          | DRO-TFF | 21.08        | <u>0.741</u> | 0.109        | 22.71        | 0.763        | 0.090        | 26.28        | 0.843        | 0.060        | 27.64        | 0.853        | 0.051        | 29.17        | 0.888        | 0.043        | 30.37        | 0.906        | 0.037        |
|          | NeurTV  | <u>22.00</u> | 0.729        | <u>0.098</u> | <u>24.86</u> | <u>0.827</u> | <u>0.071</u> | <u>26.55</u> | <u>0.871</u> | <u>0.058</u> | <u>28.21</u> | <u>0.905</u> | <u>0.048</u> | <u>29.80</u> | <u>0.927</u> | <u>0.040</u> | <u>31.02</u> | <u>0.932</u> | <u>0.035</u> |
|          | Ours    | <b>23.44</b> | <b>0.784</b> | <b>0.083</b> | <b>26.33</b> | <b>0.865</b> | <b>0.060</b> | <b>28.53</b> | <b>0.907</b> | <b>0.046</b> | <b>30.45</b> | <b>0.932</b> | <b>0.037</b> | <b>32.05</b> | <b>0.946</b> | <b>0.031</b> | <b>33.61</b> | <b>0.958</b> | <b>0.026</b> |
| House    | TRLRF   | 15.69        | 0.208        | 0.240        | 17.92        | 0.360        | 0.186        | 20.58        | 0.520        | 0.137        | 22.25        | 0.617        | 0.113        | 23.75        | 0.694        | 0.095        | 25.12        | 0.751        | 0.081        |
|          | FCTN    | 15.47        | 0.248        | 0.246        | 18.13        | 0.424        | 0.181        | 19.76        | 0.545        | 0.150        | 20.85        | 0.619        | 0.133        | 22.20        | 0.681        | 0.113        | 24.44        | 0.756        | 0.088        |
|          | HLRTF   | 17.93        | 0.378        | 0.186        | 21.48        | 0.589        | 0.123        | 23.93        | 0.723        | 0.093        | 25.40        | 0.781        | 0.078        | 26.76        | 0.828        | 0.067        | 28.19        | 0.871        | 0.057        |
|          | LRTFR   | 19.51        | 0.460        | 0.155        | 21.72        | 0.604        | 0.120        | 24.77        | 0.743        | 0.084        | 26.26        | 0.796        | 0.071        | 26.91        | 0.834        | 0.066        | 28.58        | 0.879        | 0.054        |
|          | DRO-TFF | 19.17        | 0.582        | 0.161        | 23.06        | 0.696        | 0.103        | 25.04        | 0.759        | 0.082        | 26.89        | 0.828        | 0.066        | 27.97        | 0.848        | 0.058        | 28.99        | 0.875        | 0.052        |
|          | NeurTV  | <u>21.06</u> | <u>0.651</u> | <u>0.129</u> | <u>23.28</u> | <u>0.761</u> | <u>0.100</u> | <u>25.56</u> | <u>0.820</u> | <u>0.077</u> | <u>26.99</u> | <u>0.856</u> | <u>0.065</u> | <u>28.26</u> | <u>0.881</u> | <u>0.056</u> | <u>29.02</u> | <u>0.910</u> | <u>0.052</u> |
|          | Ours    | <b>22.68</b> | <b>0.715</b> | <b>0.107</b> | <b>25.36</b> | <b>0.821</b> | <b>0.079</b> | <b>27.22</b> | <b>0.870</b> | <b>0.064</b> | <b>28.60</b> | <b>0.900</b> | <b>0.054</b> | <b>29.99</b> | <b>0.923</b> | <b>0.046</b> | <b>30.98</b> | <b>0.934</b> | <b>0.041</b> |
| Pepper   | TRLRF   | 12.97        | 0.139        | 0.409        | 16.83        | 0.273        | 0.262        | 18.77        | 0.384        | 0.210        | 20.99        | 0.493        | 0.162        | 22.92        | 0.580        | 0.130        | 24.23        | 0.646        | 0.112        |
|          | FCTN    | 13.86        | 0.166        | 0.369        | 16.24        | 0.282        | 0.281        | 18.82        | 0.403        | 0.209        | 20.90        | 0.501        | 0.164        | 23.02        | 0.594        | 0.129        | 24.37        | 0.650        | 0.110        |
|          | HLRTF   | 15.66        | 0.249        | 0.300        | 19.19        | 0.451        | 0.200        | 21.68        | 0.579        | 0.150        | 24.03        | 0.695        | 0.114        | 25.62        | 0.765        | 0.095        | 26.84        | 0.801        | 0.083        |
|          | LRTFR   | 15.06        | 0.289        | 0.321        | 20.76        | 0.537        | 0.167        | 22.95        | 0.655        | 0.130        | 24.97        | 0.720        | 0.103        | 26.15        | 0.767        | 0.090        | 27.98        | 0.796        | 0.073        |
|          | DRO-TFF | 18.84        | 0.502        | 0.208        | 23.73        | 0.730        | 0.118        | 26.55        | 0.824        | 0.086        | 28.52        | 0.871        | 0.068        | 30.22        | 0.906        | 0.056        | 31.38        | 0.923        | 0.049        |
|          | NeurTV  | <u>22.14</u> | <u>0.729</u> | <u>0.142</u> | <u>24.69</u> | <u>0.822</u> | <u>0.106</u> | <u>26.99</u> | <u>0.876</u> | <u>0.081</u> | <u>28.73</u> | <u>0.909</u> | <u>0.067</u> | <u>30.37</u> | <u>0.929</u> | <u>0.055</u> | <u>31.46</u> | <u>0.938</u> | <u>0.049</u> |
|          | Ours    | <b>23.14</b> | <b>0.755</b> | <b>0.127</b> | <b>26.10</b> | <b>0.854</b> | <b>0.090</b> | <b>28.02</b> | <b>0.878</b> | <b>0.072</b> | <b>29.82</b> | <b>0.919</b> | <b>0.059</b> | <b>31.29</b> | <b>0.935</b> | <b>0.050</b> | <b>32.46</b> | <b>0.945</b> | <b>0.043</b> |
| Sailboat | TRLRF   | 15.17        | 0.197        | 0.306        | 17.35        | 0.324        | 0.238        | 19.44        | 0.438        | 0.187        | 21.53        | 0.547        | 0.147        | 22.66        | 0.606        | 0.129        | 24.45        | 0.683        | 0.105        |
|          | FCTN    | 14.69        | 0.209        | 0.323        | 17.37        | 0.362        | 0.238        | 18.61        | 0.434        | 0.206        | 21.07        | 0.545        | 0.155        | 22.79        | 0.631        | 0.127        | 24.16        | 0.687        | 0.109        |
|          | HLRTF   | 18.12        | 0.366        | 0.218        | 20.98        | 0.539        | 0.157        | 23.07        | 0.648        | 0.123        | 24.86        | 0.728        | 0.100        | 26.35        | 0.794        | 0.084        | 27.66        | 0.838        | 0.073        |
|          | LRTFR   | 18.88        | 0.412        | 0.200        | 20.96        | 0.552        | 0.157        | 23.95        | 0.693        | 0.111        | 25.00        | 0.744        | 0.099        | 27.04        | 0.806        | 0.078        | 29.03        | 0.871        | 0.062        |
|          | DRO-TFF | 21.07        | 0.658        | 0.155        | 23.37        | 0.747        | 0.119        | 25.47        | 0.800        | <u>0.093</u> | 27.01        | 0.839        | 0.078        | 28.15        | 0.862        | 0.069        | 29.40        | 0.890        | 0.059        |
|          | NeurTV  | <u>21.55</u> | <u>0.663</u> | <u>0.147</u> | <u>23.79</u> | <u>0.778</u> | <u>0.113</u> | <u>25.53</u> | <u>0.819</u> | <u>0.093</u> | <u>27.29</u> | <u>0.865</u> | <u>0.076</u> | <u>28.47</u> | <u>0.888</u> | <u>0.066</u> | <u>29.60</u> | <u>0.916</u> | <u>0.058</u> |
|          | Ours    | <b>22.43</b> | <b>0.722</b> | <b>0.133</b> | <b>25.00</b> | <b>0.823</b> | <b>0.099</b> | <b>27.11</b> | <b>0.876</b> | <b>0.077</b> | <b>28.62</b> | <b>0.907</b> | <b>0.065</b> | <b>29.80</b> | <b>0.923</b> | <b>0.057</b> | <b>31.00</b> | <b>0.938</b> | <b>0.049</b> |

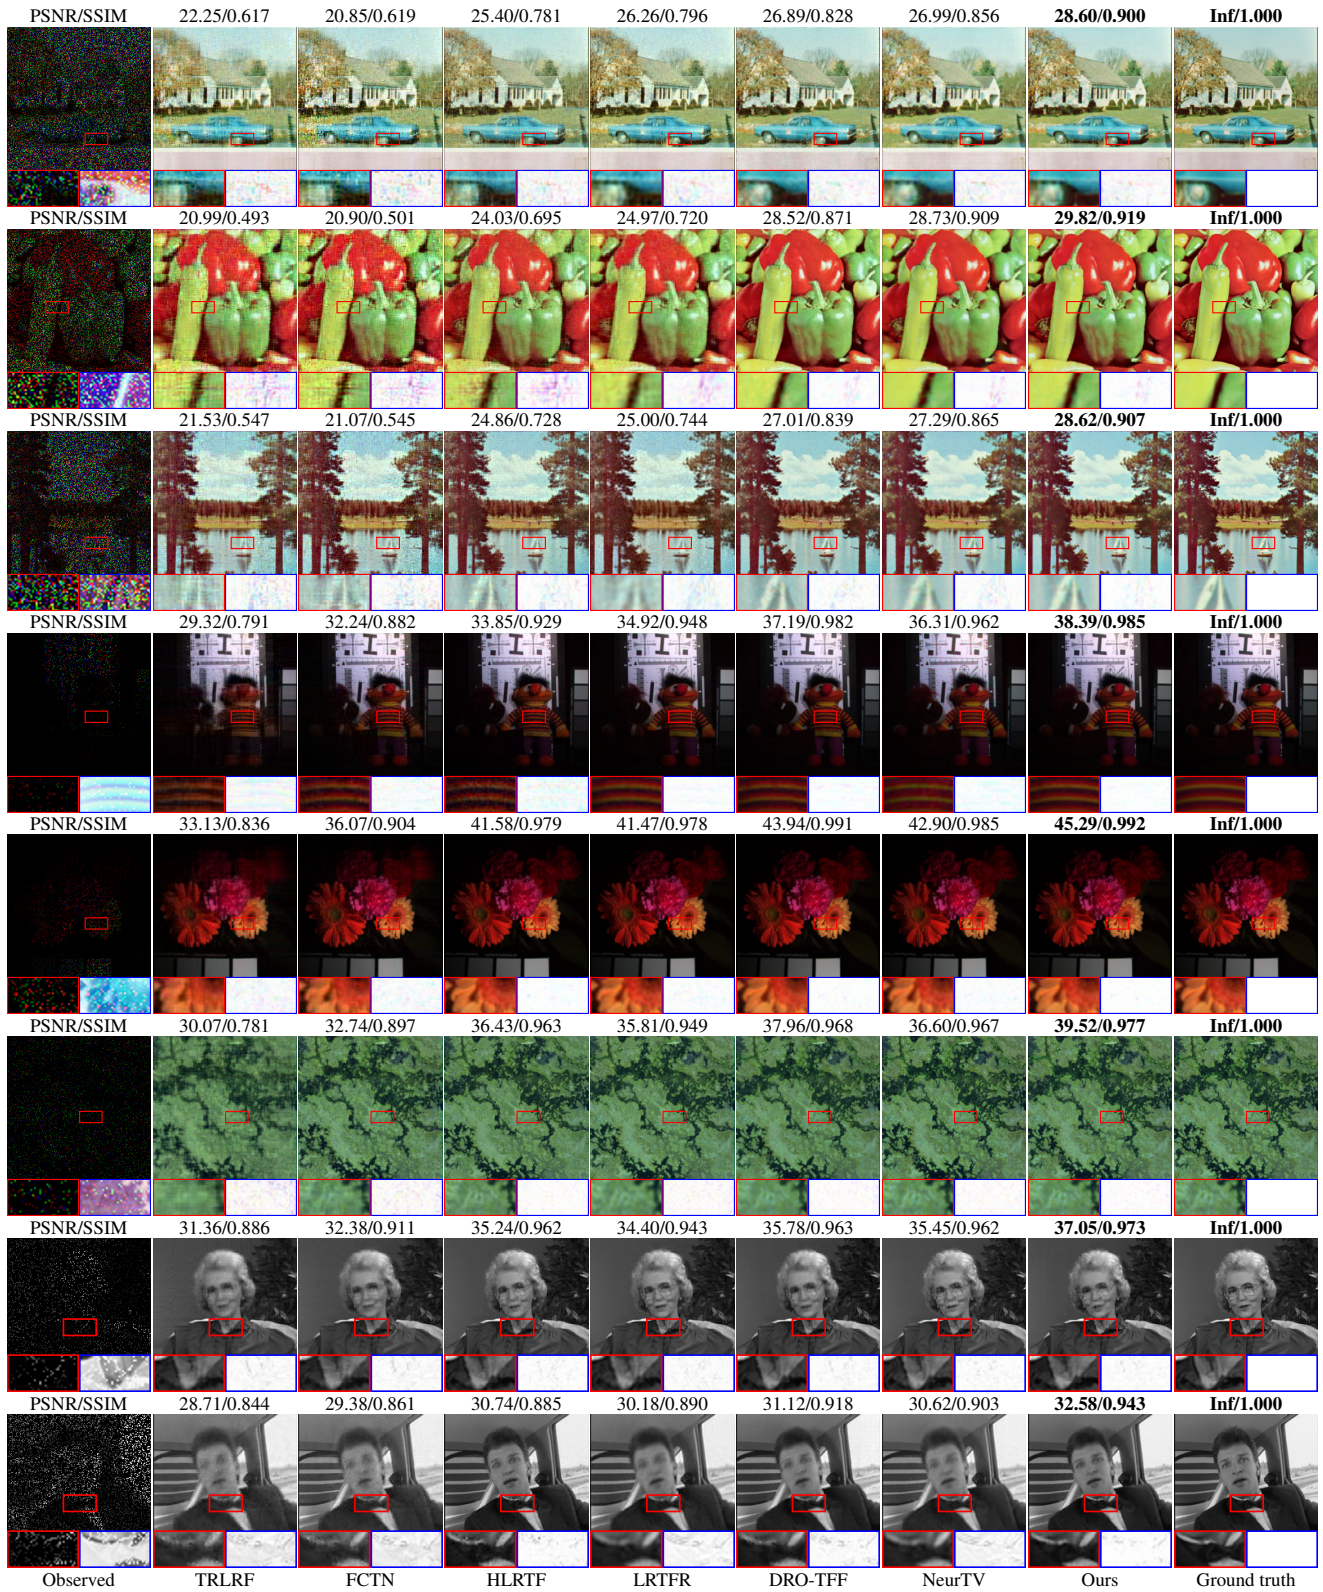

Figure S5. Visual inpainting results on various datasets. From top to bottom: color images (*House*, *Peppers*, *Sailboat*) with  $SR = 0.2$ ; MSIs (*Toy*, *Flowers*) with  $SR = 0.05$  and  $0.1$ , respectively; HSI (*Botswana*) with  $SR = 0.05$ ; and video sequences (*Grandma*, *Carphone*) with  $SR = 0.1$  and  $0.2$ , respectively.

Table S5. Quantitative comparison on MSIs, HSIs and videos. PSNR, SSIM, and NRMSE are reported under different SRs.

| Data                                      | Method  | SR = 0.03    |              |              | SR = 0.05    |              |              | SR = 0.1     |              |              | SR = 0.15    |              |              | SR = 0.2     |              |              |
|-------------------------------------------|---------|--------------|--------------|--------------|--------------|--------------|--------------|--------------|--------------|--------------|--------------|--------------|--------------|--------------|--------------|--------------|
|                                           |         | PSNR         | SSIM         | NRMSE        |
| <i>Toys</i><br>(256 × 256 × 31)           | TRLRF   | 25.13        | 0.625        | 0.189        | 29.32        | 0.791        | 0.117        | 33.67        | 0.901        | 0.071        | 36.56        | 0.943        | 0.051        | 38.67        | 0.964        | 0.040        |
|                                           | FCTN    | 28.22        | 0.788        | 0.132        | 32.24        | 0.882        | 0.083        | 37.46        | 0.955        | 0.046        | 40.04        | 0.972        | 0.034        | 42.04        | 0.982        | 0.027        |
|                                           | HLRTF   | 30.73        | 0.880        | 0.099        | 33.85        | 0.929        | 0.069        | 40.15        | 0.982        | 0.033        | 42.64        | 0.988        | 0.025        | 45.56        | 0.993        | 0.018        |
|                                           | LRTFR   | 32.95        | 0.924        | 0.077        | 34.92        | 0.948        | 0.061        | 39.95        | 0.982        | 0.034        | 41.87        | 0.987        | 0.027        | 43.64        | 0.988        | 0.022        |
|                                           | DRO-TFF | <u>33.88</u> | <u>0.966</u> | <u>0.069</u> | <u>37.19</u> | <u>0.982</u> | <u>0.047</u> | <u>40.62</u> | <u>0.992</u> | <u>0.032</u> | <u>43.73</u> | <u>0.994</u> | <u>0.022</u> | <u>45.75</u> | <u>0.995</u> | <u>0.017</u> |
|                                           | NeurTV  | 33.34        | 0.927        | 0.073        | 36.31        | 0.962        | 0.052        | 40.43        | 0.984        | <u>0.032</u> | 42.31        | 0.987        | 0.026        | 43.09        | 0.987        | 0.024        |
|                                           | Ours    | <b>35.16</b> | <b>0.972</b> | <b>0.059</b> | <b>38.39</b> | <b>0.984</b> | <b>0.041</b> | <b>44.04</b> | <b>0.993</b> | <b>0.021</b> | <b>47.16</b> | <b>0.995</b> | <b>0.015</b> | <b>48.67</b> | <b>0.996</b> | <b>0.011</b> |
| <i>Flowers</i><br>(256 × 256 × 31)        | TRLRF   | 25.38        | 0.604        | 0.318        | 28.57        | 0.705        | 0.220        | 33.13        | 0.836        | 0.130        | 35.79        | 0.902        | 0.096        | 38.81        | 0.944        | 0.068        |
|                                           | FCTN    | 28.31        | 0.718        | 0.227        | 31.17        | 0.793        | 0.163        | 36.07        | 0.904        | 0.093        | 38.61        | 0.939        | 0.069        | 42.22        | 0.970        | 0.046        |
|                                           | HLRTF   | 30.42        | 0.830        | 0.178        | 35.92        | 0.945        | 0.095        | 41.58        | 0.979        | 0.049        | 44.32        | 0.988        | 0.036        | 46.84        | 0.992        | 0.027        |
|                                           | LRTFR   | 32.64        | 0.884        | 0.138        | 37.84        | 0.956        | 0.076        | 41.47        | 0.978        | 0.050        | 43.10        | 0.982        | 0.041        | 44.27        | 0.986        | 0.036        |
|                                           | DRO-TFF | <u>37.09</u> | <b>0.970</b> | <b>0.082</b> | <u>39.71</u> | <u>0.982</u> | <u>0.061</u> | <u>43.94</u> | <u>0.991</u> | <u>0.038</u> | <u>46.28</u> | <u>0.994</u> | <u>0.029</u> | <u>47.51</u> | <u>0.995</u> | <u>0.025</u> |
|                                           | NeurTV  | 35.61        | <u>0.934</u> | <u>0.098</u> | 38.67        | 0.966        | 0.069        | 42.90        | 0.985        | 0.042        | 45.12        | 0.990        | 0.033        | 46.54        | 0.992        | 0.028        |
|                                           | Ours    | <b>37.11</b> | <b>0.970</b> | <b>0.082</b> | <b>40.30</b> | <b>0.983</b> | <b>0.057</b> | <b>45.29</b> | <b>0.992</b> | <b>0.032</b> | <b>48.32</b> | <b>0.995</b> | <b>0.023</b> | <b>50.13</b> | <b>0.996</b> | <b>0.018</b> |
| <i>Washington DC</i><br>(256 × 256 × 191) | TRLRF   | 26.83        | 0.635        | 0.258        | 29.22        | 0.771        | 0.196        | 32.40        | 0.914        | 0.136        | 35.31        | 0.954        | 0.097        | 37.98        | 0.973        | 0.071        |
|                                           | FCTN    | 28.76        | 0.830        | 0.207        | 32.09        | 0.912        | 0.141        | 34.52        | 0.946        | 0.106        | 36.38        | 0.963        | 0.086        | 41.62        | 0.987        | 0.047        |
|                                           | HLRTF   | 35.31        | 0.957        | 0.097        | 38.29        | 0.976        | 0.069        | 41.68        | 0.988        | 0.047        | 45.04        | <u>0.994</u> | 0.032        | 46.66        | <u>0.995</u> | 0.026        |
|                                           | LRTFR   | 34.08        | 0.943        | 0.112        | 37.42        | 0.975        | 0.076        | 40.72        | 0.988        | 0.052        | 45.08        | 0.993        | 0.032        | 46.56        | 0.994        | 0.027        |
|                                           | DRO-TFF | <u>36.83</u> | <u>0.961</u> | <u>0.082</u> | <u>39.22</u> | 0.975        | <u>0.062</u> | 41.62        | 0.988        | 0.047        | 42.84        | 0.990        | 0.041        | 44.13        | 0.993        | 0.035        |
|                                           | NeurTV  | 35.03        | 0.950        | 0.100        | 38.98        | <u>0.977</u> | 0.063        | <u>44.66</u> | <u>0.992</u> | <u>0.033</u> | <u>46.40</u> | 0.993        | <u>0.027</u> | <u>47.20</u> | <u>0.995</u> | <u>0.025</u> |
|                                           | Ours    | <b>38.44</b> | <b>0.979</b> | <b>0.068</b> | <b>41.97</b> | <b>0.990</b> | <b>0.045</b> | <b>45.62</b> | <b>0.994</b> | <b>0.030</b> | <b>47.26</b> | <b>0.995</b> | <b>0.025</b> | <b>47.96</b> | <b>0.996</b> | <b>0.023</b> |
| <i>Botswana</i><br>(256 × 256 × 145)      | TRLRF   | 26.89        | 0.620        | 0.186        | 30.07        | 0.781        | 0.129        | 32.08        | 0.883        | 0.102        | 34.12        | 0.922        | 0.081        | 35.49        | 0.941        | 0.069        |
|                                           | FCTN    | 29.32        | 0.804        | 0.141        | 32.74        | 0.897        | 0.095        | 35.36        | 0.939        | 0.070        | 36.22        | 0.949        | 0.063        | 37.70        | 0.962        | 0.054        |
|                                           | HLRTF   | 33.04        | 0.918        | 0.092        | 36.43        | 0.963        | 0.062        | 38.60        | 0.979        | 0.048        | 39.13        | 0.981        | 0.045        | 40.39        | 0.989        | 0.039        |
|                                           | LRTFR   | 32.87        | 0.906        | 0.093        | 35.81        | 0.949        | 0.067        | 37.49        | 0.964        | 0.055        | 40.05        | 0.980        | 0.041        | 41.86        | 0.986        | <u>0.033</u> |
|                                           | DRO-TFF | <u>34.74</u> | <u>0.945</u> | <u>0.075</u> | <u>37.96</u> | <u>0.968</u> | <u>0.052</u> | <u>40.84</u> | 0.981        | <u>0.037</u> | <u>41.38</u> | 0.982        | <u>0.035</u> | <u>42.01</u> | 0.984        | <u>0.033</u> |
|                                           | NeurTV  | 34.23        | 0.930        | 0.080        | 36.60        | 0.967        | 0.061        | 39.32        | <u>0.982</u> | 0.044        | 40.25        | <u>0.984</u> | 0.040        | 40.74        | <u>0.990</u> | 0.038        |
|                                           | Ours    | <b>37.11</b> | <b>0.965</b> | <b>0.057</b> | <b>39.52</b> | <b>0.977</b> | <b>0.043</b> | <b>42.81</b> | <b>0.987</b> | <b>0.030</b> | <b>44.40</b> | <b>0.990</b> | <b>0.025</b> | <b>45.27</b> | <b>0.992</b> | <b>0.022</b> |
| <i>News</i><br>(144 × 176 × 100)          | TRLRF   | 23.66        | 0.687        | 0.180        | 25.05        | 0.751        | 0.153        | 26.76        | 0.812        | 0.126        | 28.18        | 0.857        | 0.107        | 30.00        | 0.895        | 0.087        |
|                                           | FCTN    | 24.28        | 0.710        | 0.168        | 25.81        | 0.776        | 0.141        | 27.74        | 0.837        | 0.113        | 29.24        | 0.877        | 0.095        | 31.00        | 0.915        | 0.077        |
|                                           | HLRTF   | 25.28        | 0.811        | 0.149        | 26.61        | 0.842        | 0.128        | 29.64        | 0.914        | 0.090        | 31.28        | 0.937        | 0.075        | 32.37        | 0.949        | 0.066        |
|                                           | LRTFR   | 26.15        | 0.815        | 0.135        | 26.63        | 0.811        | 0.128        | 29.62        | 0.893        | 0.091        | 30.58        | 0.910        | 0.081        | 31.86        | 0.931        | 0.070        |
|                                           | DRO-TFF | <u>27.91</u> | <u>0.894</u> | <u>0.110</u> | <u>28.89</u> | <u>0.909</u> | <u>0.099</u> | <u>30.66</u> | <u>0.937</u> | <u>0.080</u> | <u>32.28</u> | <u>0.953</u> | <u>0.067</u> | <u>33.02</u> | <u>0.960</u> | <u>0.061</u> |
|                                           | NeurTV  | 26.31        | 0.811        | 0.133        | 27.67        | 0.842        | 0.113        | 30.05        | 0.902        | 0.086        | 31.42        | 0.919        | 0.074        | 32.58        | 0.939        | 0.064        |
|                                           | Ours    | <b>28.74</b> | <b>0.917</b> | <b>0.100</b> | <b>30.35</b> | <b>0.938</b> | <b>0.083</b> | <b>32.55</b> | <b>0.957</b> | <b>0.065</b> | <b>33.90</b> | <b>0.967</b> | <b>0.055</b> | <b>34.90</b> | <b>0.972</b> | <b>0.049</b> |
| <i>Carphone</i><br>(144 × 176 × 100)      | TRLRF   | 22.51        | 0.607        | 0.156        | 24.13        | 0.680        | 0.129        | 26.39        | 0.769        | 0.100        | 27.73        | 0.816        | 0.085        | 28.71        | 0.844        | 0.076        |
|                                           | FCTN    | 23.89        | 0.663        | 0.133        | 25.45        | 0.729        | 0.111        | 27.09        | 0.792        | 0.092        | 28.22        | 0.831        | 0.081        | 29.38        | 0.861        | 0.071        |
|                                           | HLRTF   | 24.28        | 0.661        | 0.127        | 25.71        | 0.732        | 0.108        | 28.12        | 0.817        | 0.082        | 29.63        | 0.859        | 0.069        | 30.74        | 0.885        | 0.060        |
|                                           | LRTFR   | 24.23        | 0.702        | 0.128        | 26.33        | 0.786        | 0.100        | 27.77        | 0.837        | 0.085        | 29.32        | 0.867        | 0.071        | 30.18        | 0.890        | 0.064        |
|                                           | DRO-TFF | <u>27.80</u> | <u>0.856</u> | <u>0.085</u> | <u>28.69</u> | <u>0.875</u> | <u>0.076</u> | <u>29.61</u> | <u>0.892</u> | <u>0.069</u> | <u>30.67</u> | <u>0.911</u> | <u>0.061</u> | <u>31.12</u> | <u>0.918</u> | <u>0.058</u> |
|                                           | NeurTV  | 25.36        | 0.709        | 0.112        | 27.29        | 0.793        | 0.090        | 28.82        | 0.847        | 0.075        | 29.69        | 0.894        | 0.068        | 30.62        | 0.903        | 0.061        |
|                                           | Ours    | <b>28.24</b> | <b>0.879</b> | <b>0.080</b> | <b>29.19</b> | <b>0.896</b> | <b>0.072</b> | <b>30.74</b> | <b>0.921</b> | <b>0.060</b> | <b>31.81</b> | <b>0.934</b> | <b>0.053</b> | <b>32.58</b> | <b>0.943</b> | <b>0.049</b> |

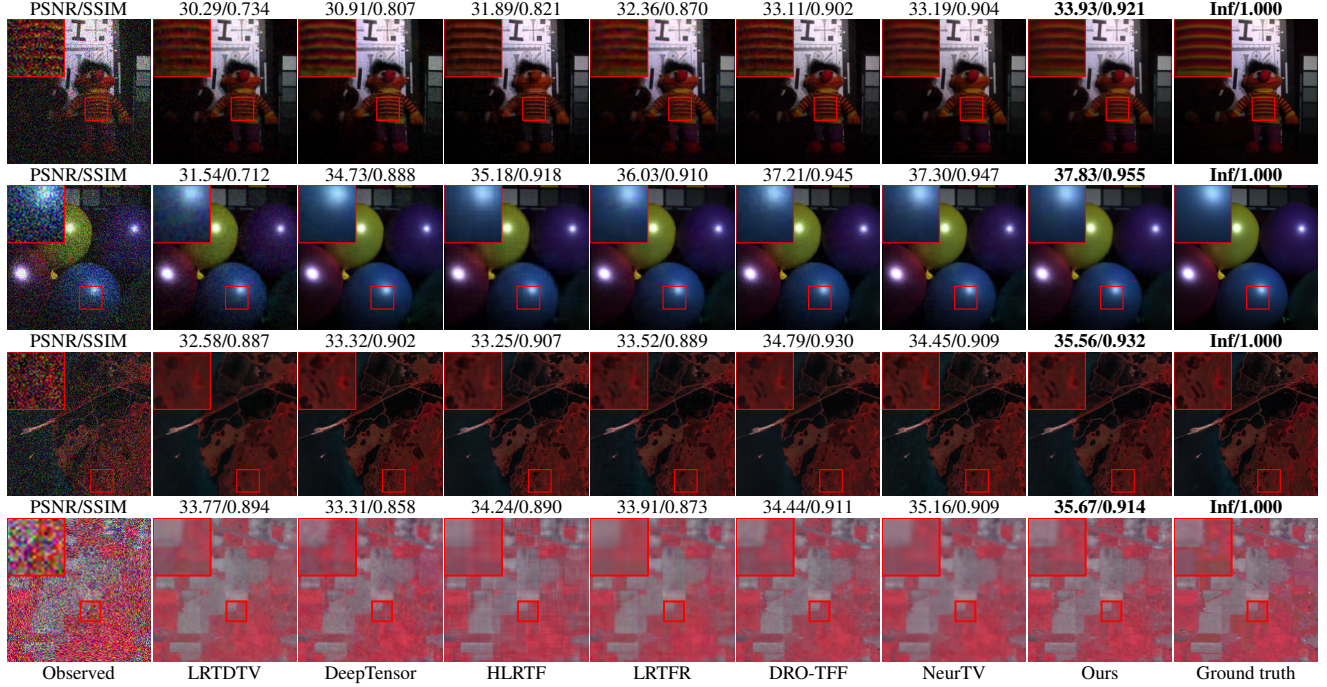

Figure S6. Visual denoising results on MSI *Toy* and *Balloons*, and HSI *KSC* and *Indian Pines* with  $SD = 0.2$ .

Table S6. Quantitative comparison for denoising under different noise levels. PSNR, SSIM, and NRMSE are reported.

| Data                                      | Method     | SD = 0.1     |              |              | SD = 0.15    |              |              | SD = 0.2     |              |              | SD = 0.25    |              |              | SD = 0.3     |              |              |
|-------------------------------------------|------------|--------------|--------------|--------------|--------------|--------------|--------------|--------------|--------------|--------------|--------------|--------------|--------------|--------------|--------------|--------------|
|                                           |            | PSNR         | SSIM         | NRMSE        |
| <i>Toys</i><br>(256 × 256 × 31)           | LRTDTV     | 34.85        | 0.906        | 0.062        | 32.17        | 0.824        | 0.084        | 30.29        | 0.734        | 0.104        | 28.79        | 0.653        | 0.124        | 27.65        | 0.581        | 0.141        |
|                                           | DeepTensor | 35.11        | 0.902        | 0.060        | 32.50        | 0.875        | 0.081        | 30.91        | 0.807        | 0.097        | 29.50        | 0.760        | 0.114        | 28.62        | 0.672        | 0.126        |
|                                           | HLRTF      | 35.70        | 0.912        | 0.056        | 33.30        | 0.883        | 0.074        | 31.89        | 0.821        | 0.087        | 30.78        | 0.768        | 0.098        | 29.46        | 0.698        | 0.115        |
|                                           | LRTFR      | 36.01        | 0.936        | 0.054        | 34.01        | 0.918        | 0.068        | 32.36        | 0.870        | 0.082        | 31.36        | 0.869        | 0.092        | 30.60        | 0.829        | 0.101        |
|                                           | DRO-TFF    | <b>37.34</b> | <u>0.954</u> | <b>0.046</b> | 35.07        | <u>0.933</u> | <u>0.060</u> | 33.11        | 0.902        | <u>0.075</u> | 32.24        | 0.887        | <u>0.083</u> | 31.10        | 0.875        | 0.095        |
|                                           | NeurTV     | 36.71        | 0.951        | 0.050        | <u>35.23</u> | 0.920        | <b>0.059</b> | <u>33.19</u> | <u>0.904</u> | <u>0.075</u> | 32.17        | 0.876        | 0.084        | <u>31.51</u> | 0.863        | <u>0.091</u> |
|                                           | Ours       | <u>37.25</u> | <b>0.958</b> | <u>0.047</u> | <b>35.30</b> | <b>0.941</b> | <b>0.059</b> | <b>33.93</b> | <b>0.921</b> | <b>0.069</b> | <b>32.89</b> | <b>0.902</b> | <b>0.077</b> | <b>32.04</b> | <b>0.889</b> | <b>0.085</b> |
| <i>Face</i><br>(256 × 256 × 31)           | LRTDTV     | 36.85        | 0.883        | 0.090        | 34.11        | 0.788        | 0.123        | 32.26        | 0.701        | 0.152        | 30.55        | 0.615        | 0.185        | 29.24        | 0.528        | 0.216        |
|                                           | DeepTensor | 37.36        | 0.926        | 0.014        | 35.51        | 0.904        | 0.017        | 34.06        | 0.859        | 0.020        | 32.62        | 0.814        | 0.023        | 31.87        | 0.732        | 0.026        |
|                                           | HLRTF      | 38.49        | 0.922        | 0.074        | 36.40        | 0.882        | 0.095        | 34.67        | 0.835        | 0.115        | 33.37        | 0.792        | 0.134        | 32.30        | 0.754        | 0.152        |
|                                           | LRTFR      | 39.09        | 0.935        | 0.069        | 36.81        | 0.896        | 0.090        | 35.13        | 0.858        | 0.109        | 33.91        | 0.821        | 0.126        | 33.01        | 0.808        | 0.140        |
|                                           | DRO-TFF    | 40.00        | 0.964        | 0.062        | 37.94        | 0.937        | 0.079        | 36.37        | 0.920        | 0.095        | 35.20        | 0.900        | 0.109        | 34.71        | 0.887        | 0.115        |
|                                           | NeurTV     | <u>40.51</u> | <u>0.968</u> | <u>0.059</u> | <u>38.46</u> | <u>0.949</u> | <u>0.075</u> | <u>36.78</u> | <u>0.927</u> | <u>0.091</u> | <u>35.77</u> | <u>0.914</u> | <u>0.102</u> | <u>35.22</u> | <u>0.902</u> | <u>0.108</u> |
|                                           | Ours       | <b>40.80</b> | <b>0.970</b> | <b>0.057</b> | <b>39.16</b> | <b>0.957</b> | <b>0.069</b> | <b>37.89</b> | <b>0.945</b> | <b>0.080</b> | <b>36.92</b> | <b>0.933</b> | <b>0.089</b> | <b>36.12</b> | <b>0.921</b> | <b>0.098</b> |
| <i>Washington DC</i><br>(256 × 256 × 191) | LRTDTV     | 34.32        | 0.924        | 0.109        | 32.83        | 0.896        | 0.129        | 31.71        | 0.869        | 0.147        | 30.84        | 0.845        | 0.163        | 30.12        | 0.823        | 0.177        |
|                                           | DeepTensor | 36.01        | 0.955        | 0.090        | 33.80        | 0.917        | 0.116        | 32.32        | 0.891        | 0.137        | 30.92        | 0.849        | 0.161        | 30.16        | 0.816        | 0.176        |
|                                           | HLRTF      | 36.27        | 0.959        | 0.087        | 34.17        | 0.927        | 0.111        | 32.75        | 0.913        | 0.131        | 31.60        | 0.892        | 0.149        | 30.85        | 0.879        | 0.162        |
|                                           | LRTFR      | 35.78        | 0.953        | 0.092        | 34.22        | 0.934        | 0.110        | 33.02        | 0.914        | 0.127        | 32.09        | 0.895        | 0.141        | 31.34        | 0.880        | 0.154        |
|                                           | DRO-TFF    | 36.65        | 0.948        | 0.083        | 35.26        | <u>0.934</u> | 0.098        | <u>34.26</u> | <u>0.919</u> | <u>0.110</u> | <u>33.35</u> | <u>0.904</u> | <u>0.122</u> | <u>32.57</u> | <u>0.885</u> | <u>0.133</u> |
|                                           | NeurTV     | <u>37.06</u> | <u>0.960</u> | <u>0.079</u> | <u>35.29</u> | 0.929        | <u>0.097</u> | 33.86        | 0.910        | 0.115        | 32.79        | 0.891        | 0.130        | 31.92        | 0.869        | 0.144        |
|                                           | Ours       | <b>37.96</b> | <b>0.971</b> | <b>0.072</b> | <b>36.32</b> | <b>0.957</b> | <b>0.087</b> | <b>35.08</b> | <b>0.945</b> | <b>0.100</b> | <b>34.16</b> | <b>0.932</b> | <b>0.111</b> | <b>33.37</b> | <b>0.918</b> | <b>0.122</b> |
| <i>Salinas</i><br>(217 × 217 × 224)       | LRTDTV     | 40.13        | 0.957        | 0.053        | 38.19        | 0.938        | 0.066        | 36.82        | 0.920        | 0.077        | 35.83        | 0.907        | 0.087        | 35.01        | 0.891        | 0.095        |
|                                           | DeepTensor | 40.25        | 0.952        | 0.052        | 38.69        | 0.938        | 0.062        | 37.05        | 0.921        | 0.075        | 36.07        | 0.902        | 0.084        | 35.47        | 0.896        | 0.090        |
|                                           | HLRTF      | 40.20        | 0.958        | 0.052        | 38.85        | 0.943        | 0.061        | 37.50        | 0.928        | 0.071        | 36.52        | 0.918        | 0.080        | 36.06        | 0.907        | 0.084        |
|                                           | LRTFR      | 40.50        | 0.963        | 0.051        | 39.16        | 0.953        | 0.059        | 37.98        | 0.943        | 0.068        | 36.98        | 0.932        | 0.076        | 36.18        | 0.921        | 0.083        |
|                                           | DRO-TFF    | 40.39        | 0.960        | 0.051        | 39.36        | 0.955        | 0.058        | 38.44        | 0.949        | 0.064        | 37.79        | 0.936        | 0.069        | 37.32        | <u>0.937</u> | 0.073        |
|                                           | NeurTV     | <u>41.66</u> | <u>0.966</u> | <u>0.044</u> | <u>40.25</u> | <u>0.961</u> | <u>0.052</u> | <u>39.64</u> | <u>0.954</u> | <u>0.056</u> | <u>38.61</u> | <u>0.939</u> | <u>0.063</u> | <u>37.65</u> | 0.930        | <u>0.070</u> |
|                                           | Ours       | <b>42.77</b> | <b>0.973</b> | <b>0.040</b> | <b>41.23</b> | <b>0.965</b> | <b>0.046</b> | <b>40.19</b> | <b>0.955</b> | <b>0.052</b> | <b>39.37</b> | <b>0.947</b> | <b>0.058</b> | <b>38.60</b> | <b>0.938</b> | <b>0.063</b> |

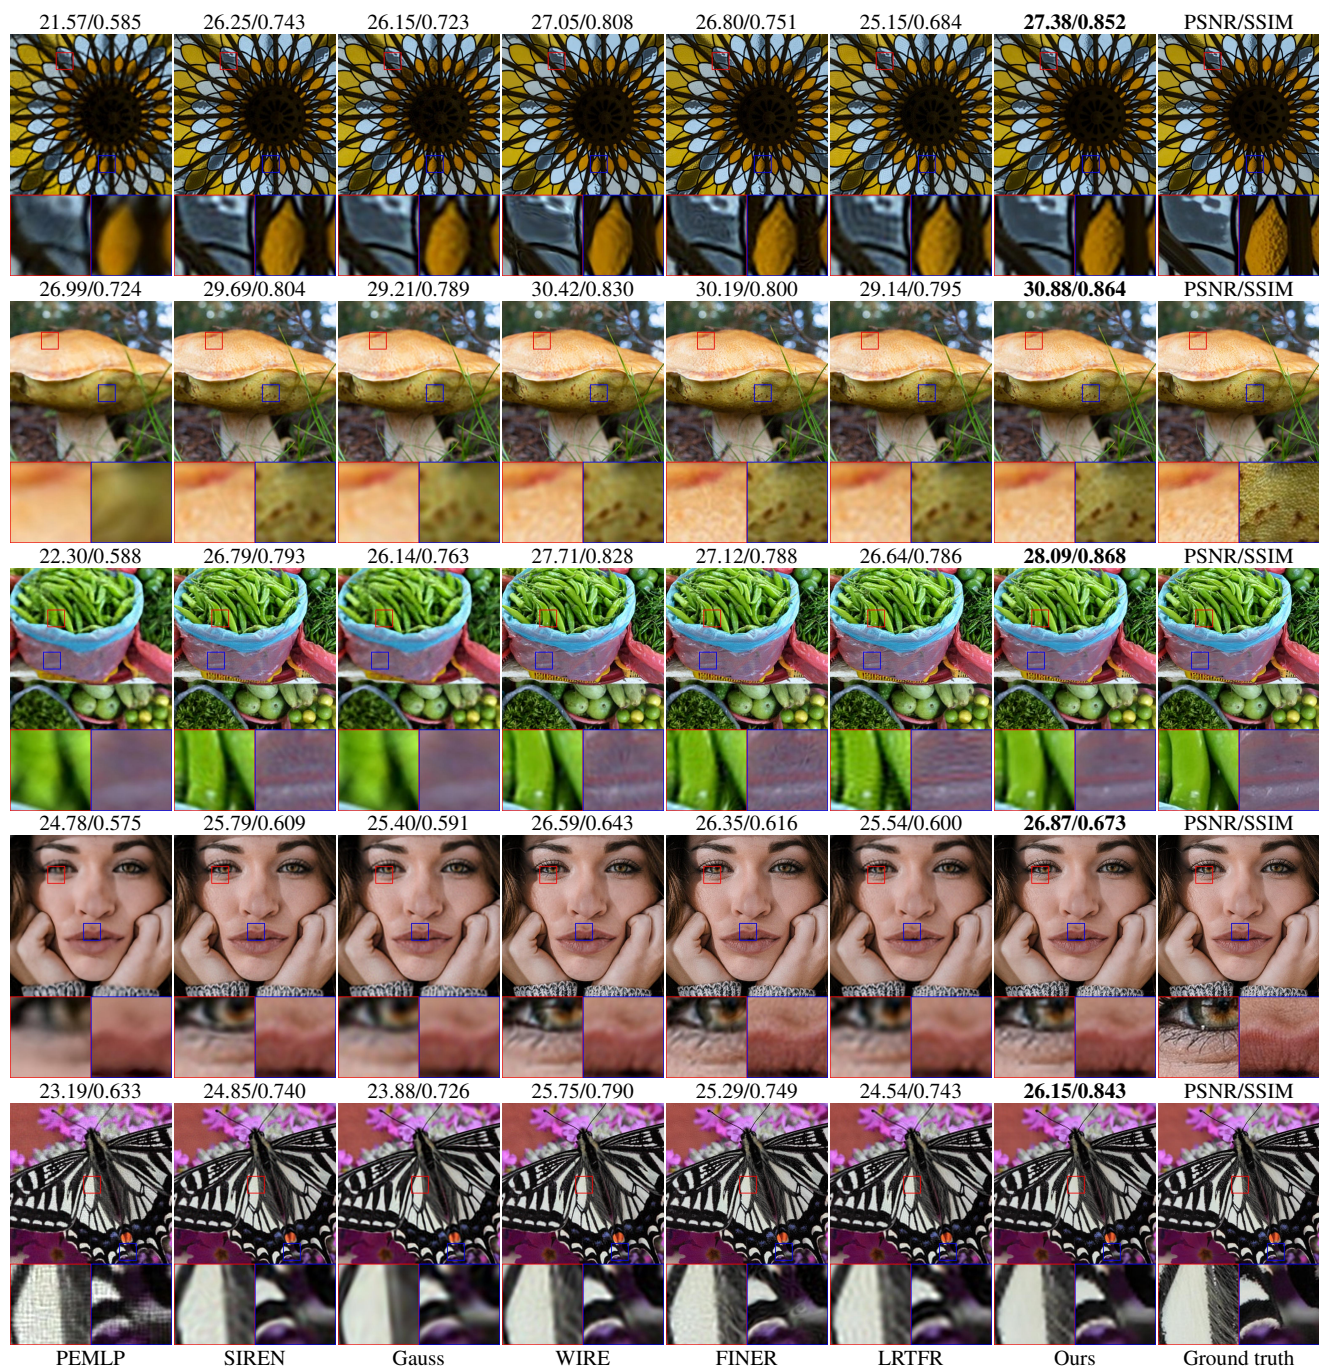

Figure S7. Visual super-resolution results at  $\times 4$  scaling on the DIV2K dataset.

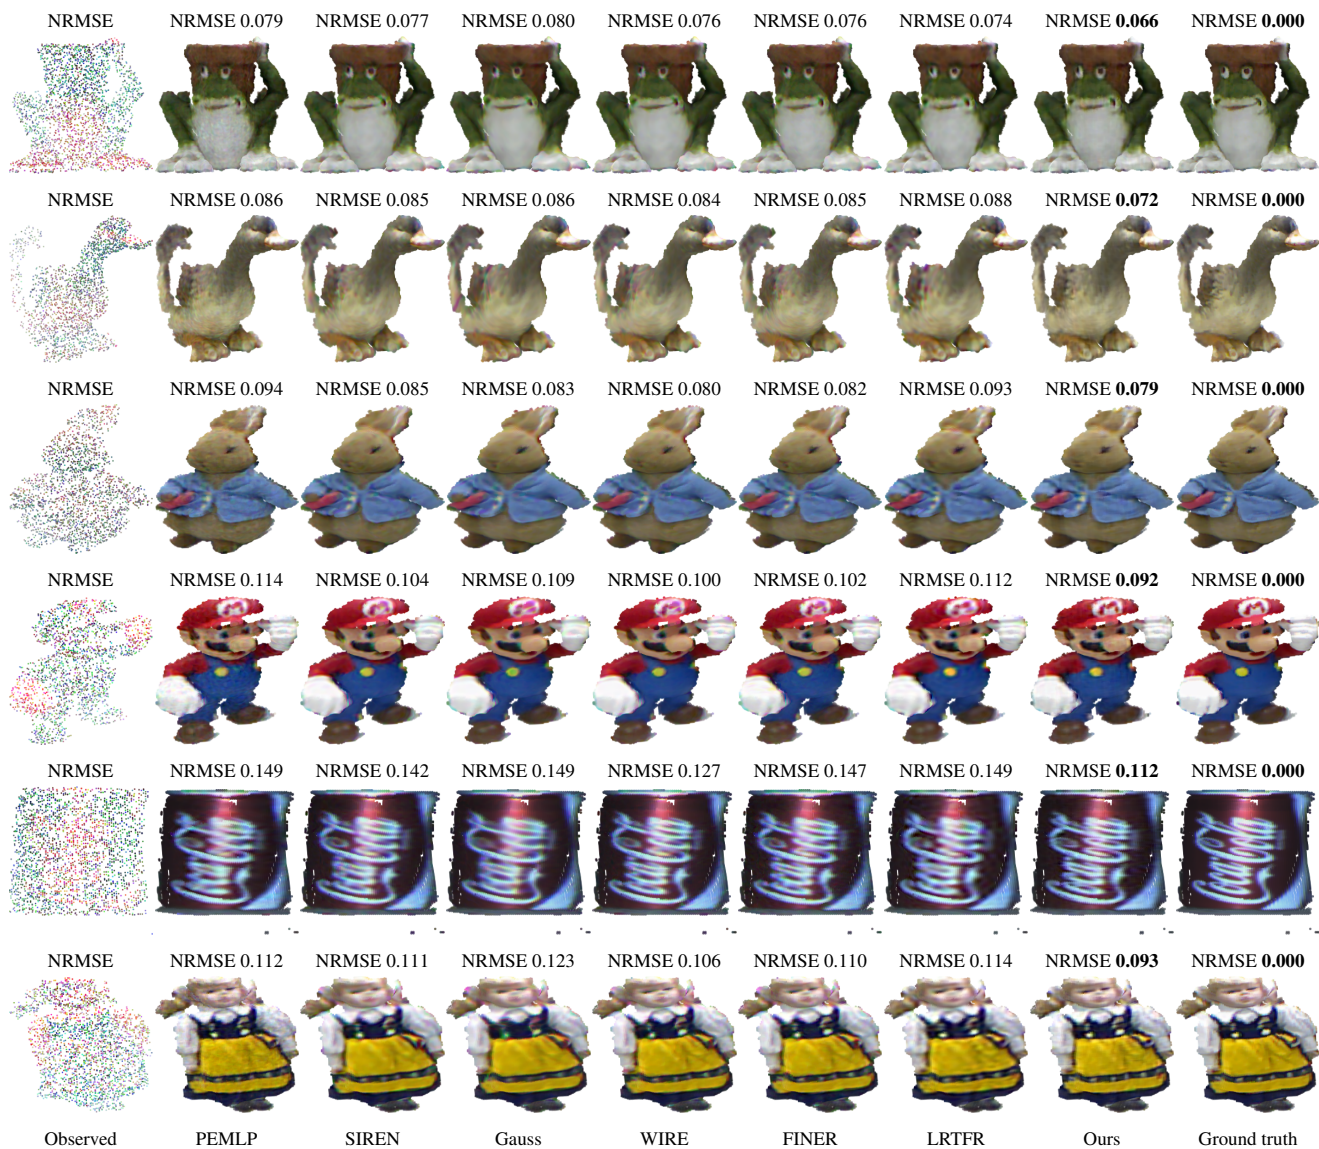

Figure S8. Visual comparisons on point cloud recovery over six objects at three SRs: SR = 0.1 (*Frog, Duck*), SR = 0.15 (*PetterRabbit, Mario*), and SR = 0.2 (*Doll, Cola*).
